# Supplementary material for: Fabrication of a silica/titania hollow nanorod and its electroresponsive activity
Source: Royal Society of Chemistry journal article supplement (doi:10.1039/c7ra01786c), 2017-01-01
Supplement: c7ra01786c1.pdf [file c7ra01786c1.pdf]

## Supporting Information

# Fabrication of Silica/Titania Hollow Nanorod and Its Electroresponsive Activity

*Chang-Min Yoon, Jungchul Noh, Yoonsun Jang and Jyongsik Jang\**

\* School of Chemical and Biological Engineering, Seoul National University, 599 Gwanak-ro, Gwanak-gu, Seoul 151-742, Korea

\* Tel.: 82-2-880-7069; Fax: 82-2-888-7295; e-mail: [jsjang@plaza.snu.ac.kr](mailto:jsjang@plaza.snu.ac.kr)

**Fig. S1**

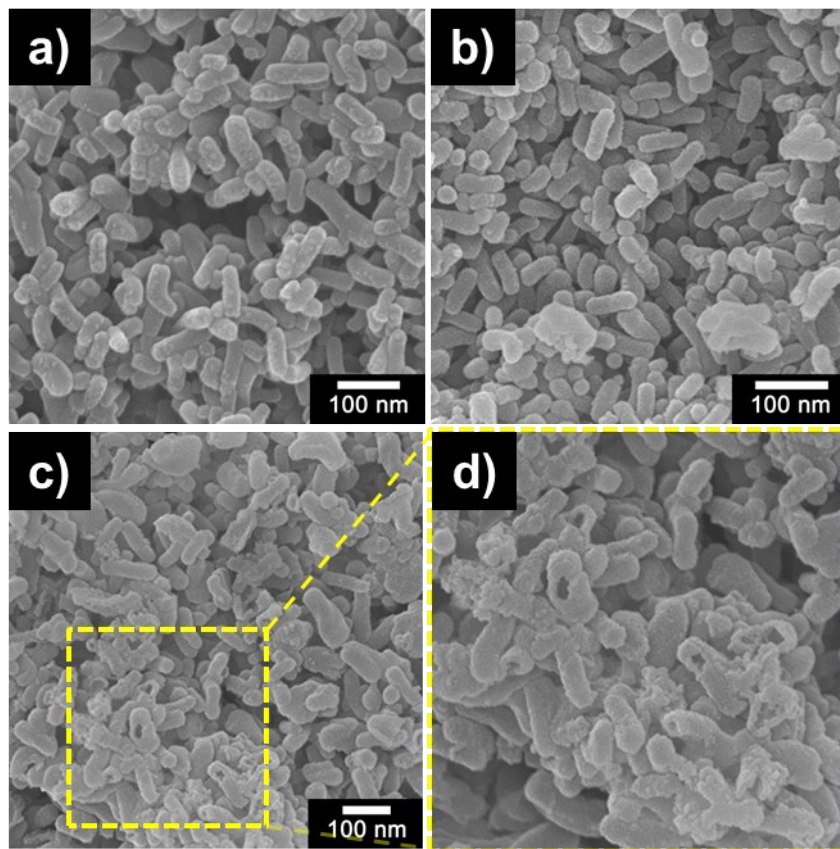

**Fig. S1** SEM micrographs of a) SiO<sub>2</sub> rod, b) ST/CS rod, and c) HST rod ( $L/D = 3$ ), respectively. d) Observation of internal hollow space from ruptured part of HST rod.

**Fig. S2**

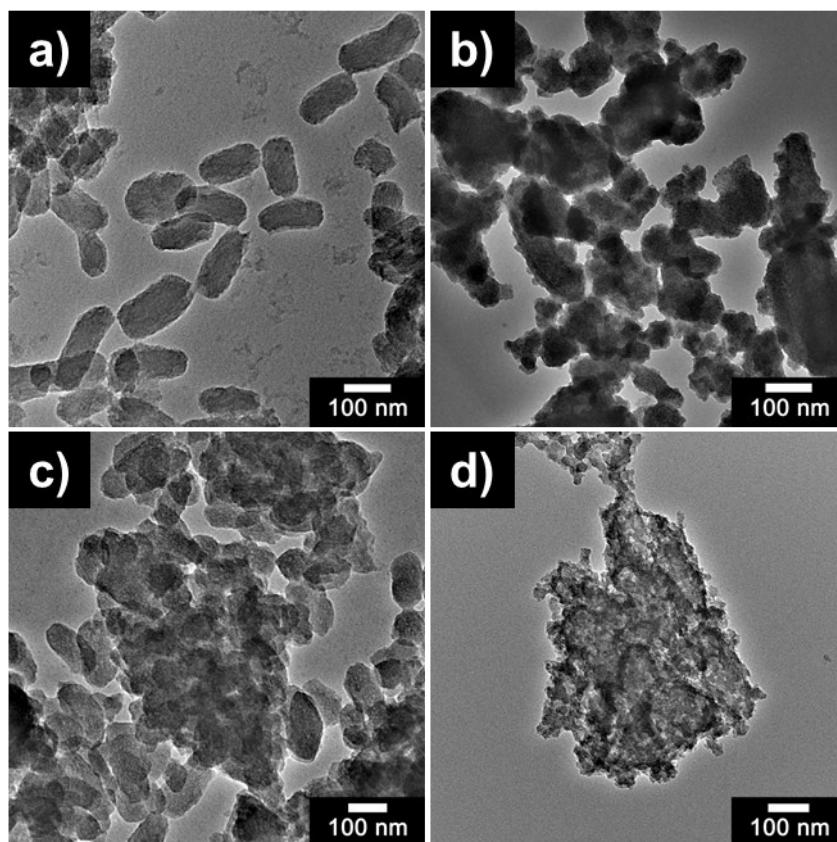

**Fig. S2** TEM micrographs of a) HCl untreated SiO<sub>2</sub> rod, b) HST rod from HCl untreated SiO<sub>2</sub> rod, c) calcined SiO<sub>2</sub> rod, and d) HST rod from calcined SiO<sub>2</sub> rod.

**Fig. S3**

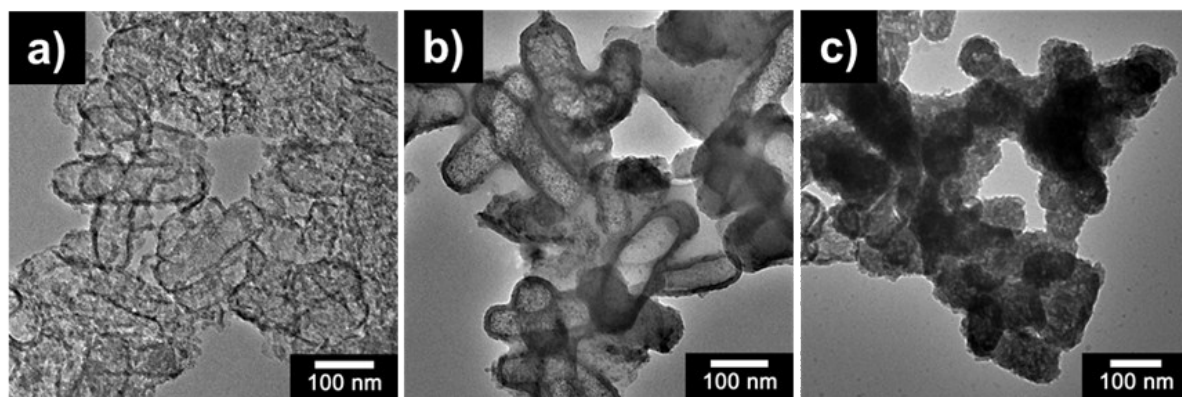

**Fig. S3** TEM micrographs of various shell thickness controlled HST nanorods fabricated by adding TTIP amount of a) 6 mL, b) 12 mL, and c) 16 mL, respectively.

Fig. S4

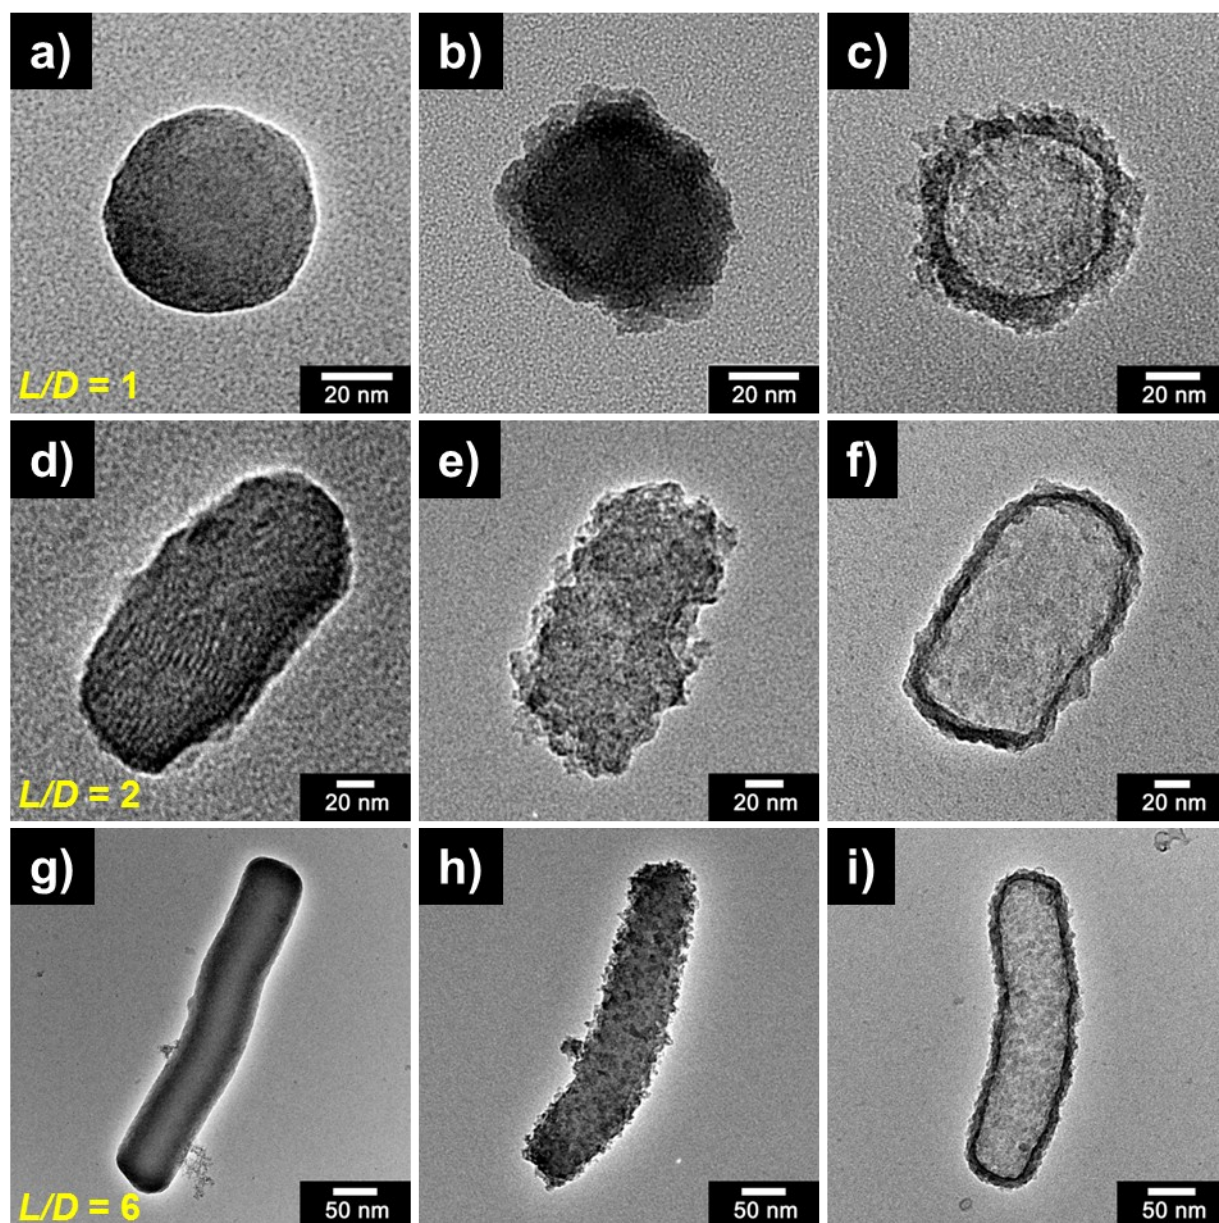

Fig. S4 TEM micrographs of SiO<sub>2</sub>, ST/CS, and HST (left to right) (a, b, c) sphere with  $L/D = 1$ , (d, e, f) rod with  $L/D = 2$ , and (g, h, i) rod with  $L/D = 6$ .

**Fig. S5**

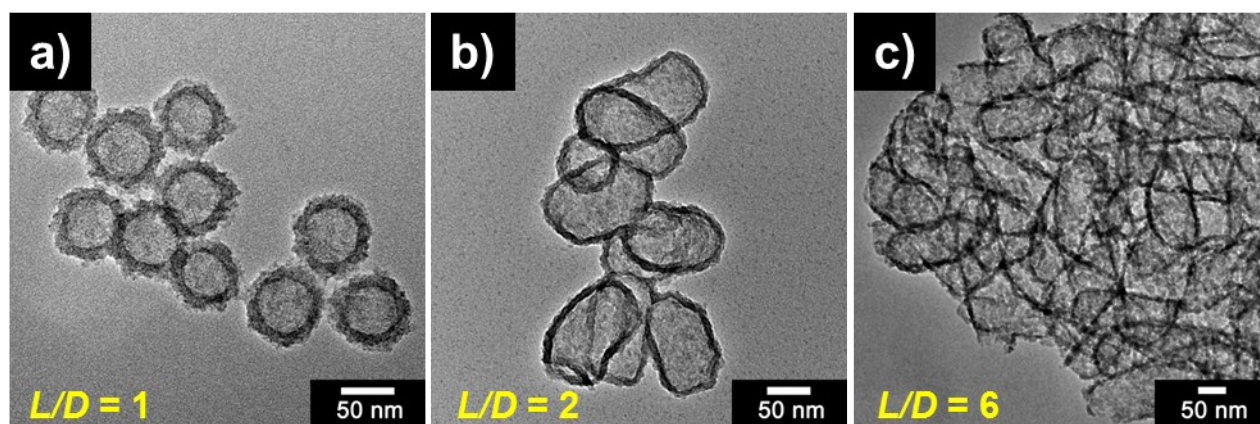

**Fig. S5** Low-magnified TEM micrographs of a) HST sphere ( $L/D = 1$ ), b) HST rod ( $L/D = 2$ ), and HST rod ( $L/D = 6$ ).

**Table S1****Table S1** Physical parameters of various HST material fabricated by same synthetic method <sup>a</sup>

| Shape  | Length (nm)   | Diameter (nm)  | <i>L/D</i> | BET area (m <sup>2</sup> g <sup>-1</sup> ) <sup>b</sup> | Pore volume (cm <sup>3</sup> g <sup>-1</sup> ) <sup>c</sup> |
|--------|---------------|----------------|------------|---------------------------------------------------------|-------------------------------------------------------------|
| sphere | <i>ca.</i> 75 | <i>ca.</i> 75  | 1          | 435.3                                                   | 0.69                                                        |
| rod    | <i>ca.</i> 75 | <i>ca.</i> 155 | 2          | 469.7                                                   | 0.75                                                        |
| rod    | <i>ca.</i> 75 | <i>ca.</i> 230 | 3          | 496.8                                                   | 0.87                                                        |
| rod    | <i>ca.</i> 75 | <i>ca.</i> 460 | 6          | 522.3                                                   | 0.97                                                        |

<sup>a</sup> All materials were fabricated by sequential combination of sol-gel, TiO<sub>2</sub> coating process, and SMER method using different sized SiO<sub>2</sub> core template.

<sup>b</sup> Calculated by BET method

<sup>c</sup> Pore size of pore created on the SiO<sub>2</sub>/TiO<sub>2</sub> shell

**Table S2****Table S2** Various physical properties of SiO<sub>2</sub>, ST/CS rod, and HST rod ( $L/D = 3$ )

| Material             | BET area (m <sup>2</sup> g <sup>-1</sup> ) <sup>a</sup> | Pore volume (cm <sup>3</sup> g <sup>-1</sup> ) | Pore size (nm) <sup>b</sup> |
|----------------------|---------------------------------------------------------|------------------------------------------------|-----------------------------|
| SiO <sub>2</sub> rod | 82.8                                                    | 0.41                                           | 3.3                         |
| ST/CS rod            | 266.1                                                   | 0.56                                           | 3.8                         |
| HST rod              | 496.8                                                   | 0.87                                           | 4.0                         |

<sup>a</sup> Calculated by BET method

<sup>b</sup> Pore size of pore created on the SiO<sub>2</sub>/TiO<sub>2</sub> shell



**Table S3****Table S3** Elemental compositions of SiO<sub>2</sub> rod, ST/CS rod, and HST rod ( $L/D = 3$ )<sup>a</sup>

|                      | Si (atomic %) | Ti (atomic %) | O (atomic %) |
|----------------------|---------------|---------------|--------------|
| SiO <sub>2</sub> rod | 26.01         | -             | 73.9         |
| ST/CS rod            | 14.20         | 8.67          | 77.13        |
| HST rod              | 10.42         | 10.71         | 78.87        |

<sup>a</sup> Elemental composition of samples were acquired by EDS mode (beam current: 10.0  $\mu$ A, accelerating voltage: 10.0 kV).

**Fig. S6**

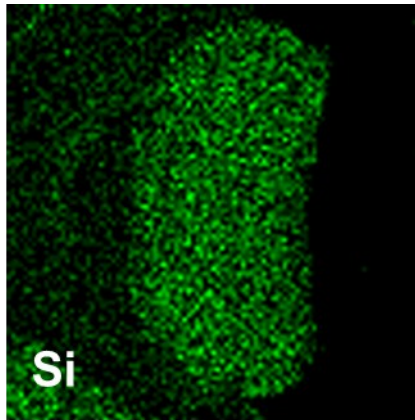

**Fig. S6** STEM elemental mapping image of SiO<sub>2</sub> (detected element: Si).

Fig. S7

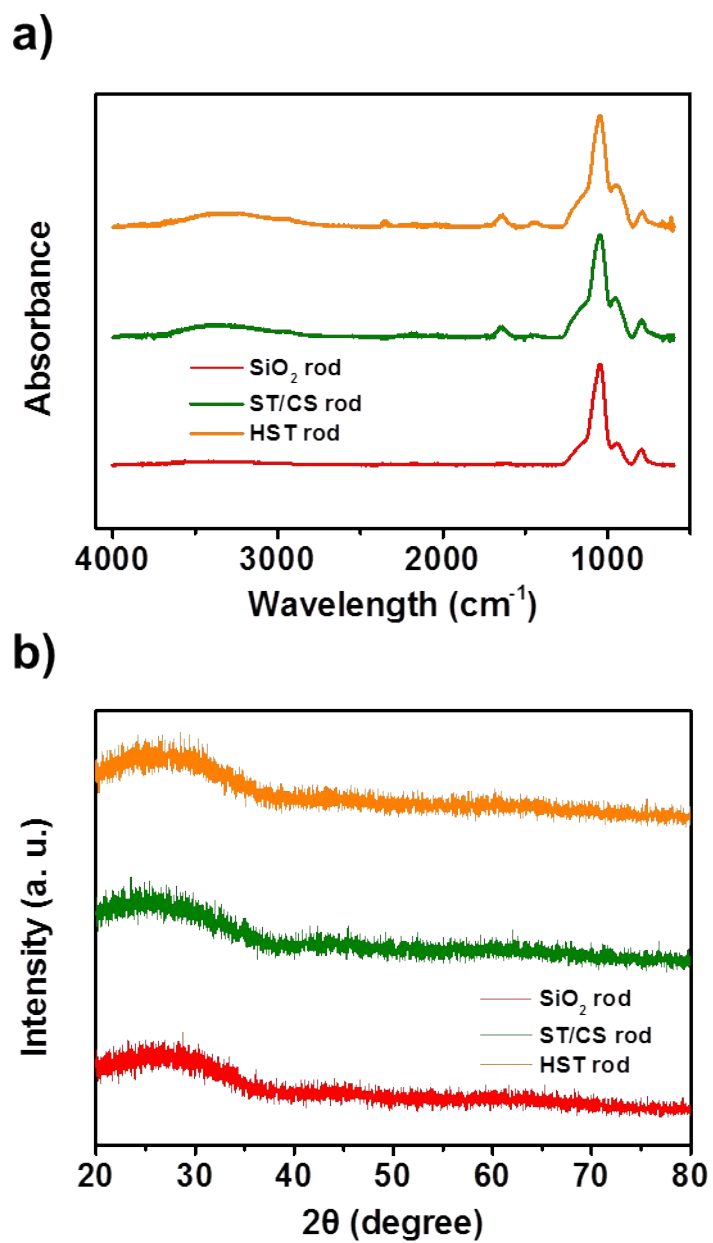

**Fig. S7** a) FT-IR spectra of SiO<sub>2</sub> rod, ST/CS rod, and HST rod ( $L/D = 3$ ). b) XRD diffraction patterns of SiO<sub>2</sub> rod, ST/CS rod, and HST rod ( $L/D = 3$ ).

**Fig. S8**

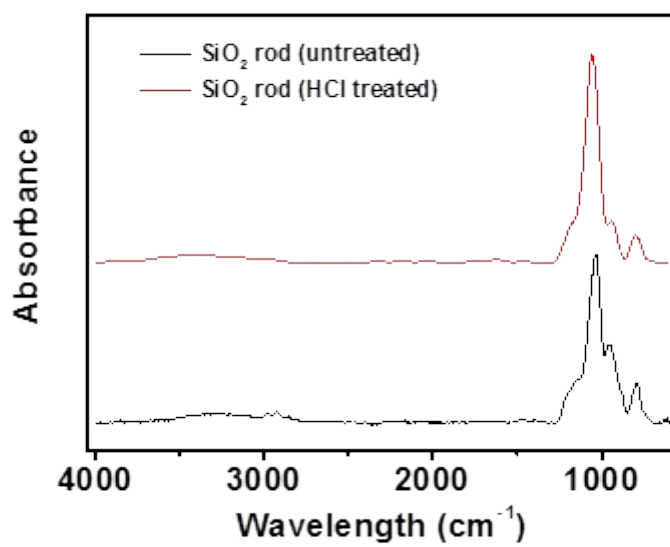

**Fig. S8** FT-IR spectra of ethanolic acid washed SiO<sub>2</sub> rod and HCl untreated SiO<sub>2</sub> rod.

**Table S4****Table S4** Elemental compositions of HST sphere and two HST rod ( $L/D = 2$  and  $6$ ).

|                       | Si (atomic %) | Ti (atomic %) | O (atomic %) |
|-----------------------|---------------|---------------|--------------|
| HST sphere (75 nm)    | 8.77          | 12.71         | 78.52        |
| HST rod ( $L/D = 2$ ) | 9.23          | 11.92         | 78.85        |
| HST rod ( $L/D = 6$ ) | 12.35         | 9.32          | 78.33        |

<sup>a</sup> Elemental composition of samples were acquired by EDS mode (beam current: 10.0  $\mu\text{A}$ , accelerating voltage: 10.0 kV).

**Fig. S9**

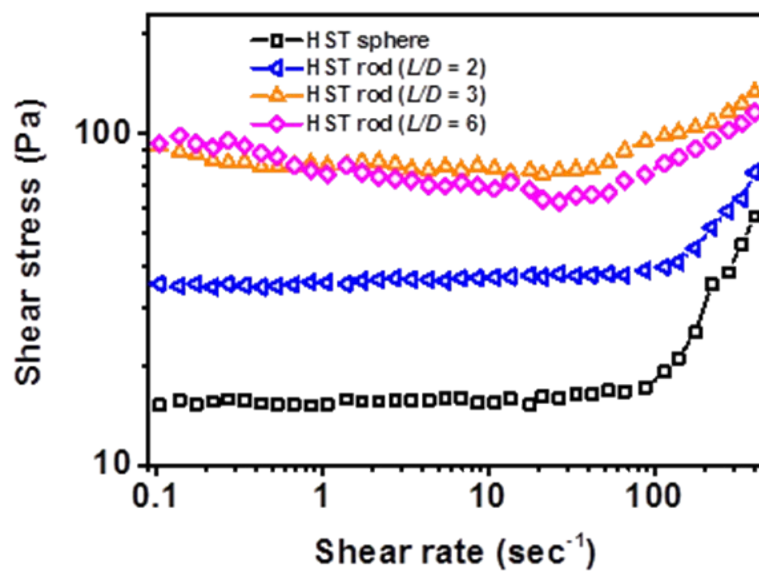

**Fig. S9** Shear stress of various HST nanomaterials-based ER fluids with different aspect ratio as a function of shear rate ( $\dot{\tau}$ ) under  $3.0 \text{ kV mm}^{-1}$  of electric field strength (3.0 wt% in silicone oil).

Fig. S10

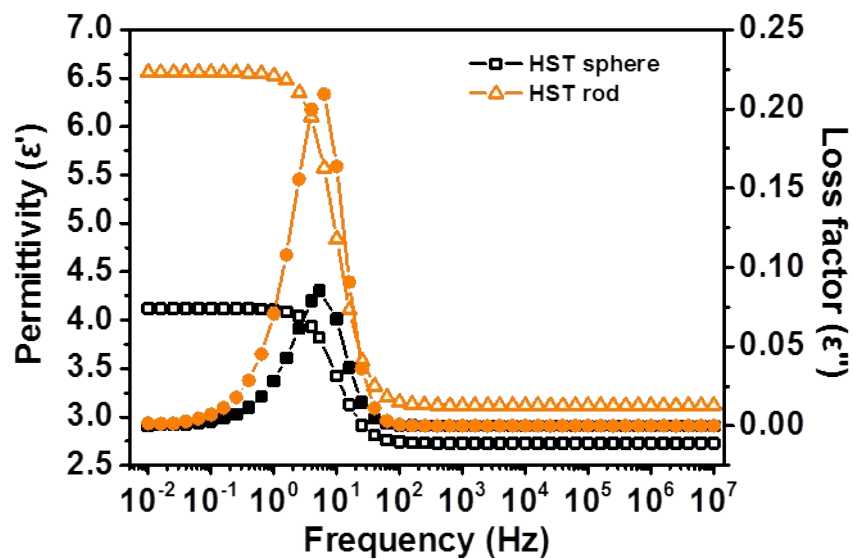

Fig. S10 Permittivity ( $\epsilon'$ , open symbol) and loss factor ( $\epsilon''$ , closed symbol) of similarly fabricated HST sphere and HST rod as a function of electric field frequency ( $f$ ).

**Fig. S11**

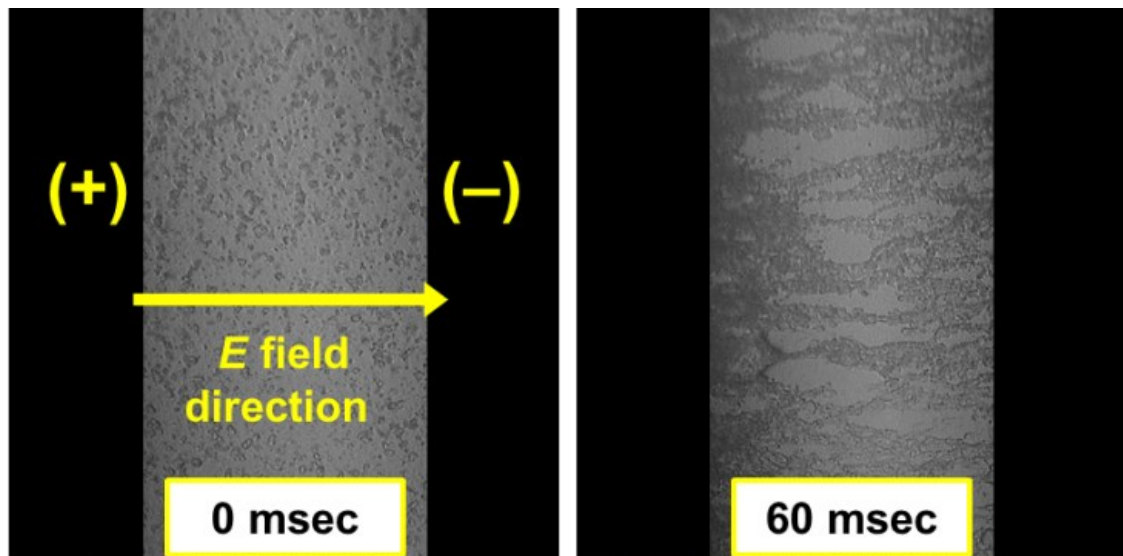

**Fig. S11** Real-time optical microscope (OM) images of structural change of HST rod materials dispersed in silicone oil (3.0 wt%) under electric field strength of  $1.0 \text{ kV mm}^{-1}$ .
